# Supplementary material for: Risk factors for Plasmodium falciparum infection in pregnant women in Burkina Faso: a community-based cross-sectional survey
Source: Springer Nature journal article supplement (doi:10.1186/s12936-021-03896-8), 2021-09-06
Supplement: MOESM1 [file 19636684]

## FORMULAIRE DE SELECTION ENROLEMENT

|                       |                                           |                                             |                                 |
|-----------------------|-------------------------------------------|---------------------------------------------|---------------------------------|
| Site de l'Etude:      | <input type="checkbox"/> Saponé           | <input type="checkbox"/> Kaya               | Village: .....                  |
|                       | <input type="checkbox"/> Femme enceinte   | <input type="checkbox"/> Femme non enceinte | <input type="checkbox"/> Enfant |
| Enquête Transversale: | <input type="checkbox"/> Saison pluvieuse | <input type="checkbox"/> Saison sèche       |                                 |

Date (DD/MMM/YYYY): |\_|\_|/|\_|\_|/|\_|\_|\_|\_|

### I. Données Démographiques

Nom: \_\_\_\_\_

ID DSS: |\_|\_|\_|\_|\_|\_|\_|\_|\_|\_|\_|\_|\_|\_|\_|\_|

N° de Sélection: |\_|\_|\_|-|\_|\_|\_|\_|

Date de naissance: |\_|\_|/|\_|\_|/|\_|\_|\_|\_| or Age: |\_|\_| ans      **Initiales:** |\_|\_|\_|\_|

### II. Explication et signature du consentement

1. Le participant a-t-il été informé au sujet de l'étude?       Oui,       Non

2. Le participant ou le RLA a-t-il signé le formulaire de consentement?       Oui,       Non

Si oui, compléter la date de signature du consentement: |\_|\_|/|\_|\_|/|\_|\_|\_|\_|

Si applicable, compléter la date de signature de l'assentiment: |\_|\_|/|\_|\_|/|\_|\_|\_|\_|

### III. Histoire médicale actuelle

1. Le participant a-t-il un problème de santé connu?       Yes,       No

Si oui, spécifier: -----

2. Existe-t-il une fièvre ou histoire de fièvre des dernières 24h?       Yes,       No

3. Le participant a-t-il reçu un antipaludique au cours des 14 derniers jours?       Yes,       No

Si oui, spécifier le nom du médicament: -----

3. Le participant a-t-il migré hors de la zone d'étude au cours des 3 derniers mois?       Yes,       No

### IV. Histoire Obstétricale      NA

1. Etes-vous déjà tombée enceinte?       Yes,       No

Si oui, compléter le reste de la section ci-dessous:

2. Nombre total de grossesses (incluant la présente): |\_|\_|\_|\_|

3. Nombre total d'enfants vivants (parité): |\_|\_|\_|\_|

4. Nombre de grossesses > 28 semaines |\_|\_|\_|\_|: Naissance vivante |\_|\_|\_|\_|      Fausse couche |\_|\_|\_|\_|

5. Nombre de grossesses < 28 semaines |\_|\_|\_|\_|: Avortement |\_|\_|\_|\_|      interruption |\_|\_|\_|\_|

## FORMULAIRE DE SELECTION ENROLEMENT

### V. Histoire prénatale (de la présente grossesse): NA

1. Nombre de consultations pénales (CPN) déjà réalisées: |\_|\_|\_|
2. Date de la première CPN: |\_|\_|\_|/|\_|\_|\_|/|\_|\_|\_|\_|\_| CSPS/CM: \_\_\_\_\_
3. Date de visite de la CPN la plus récente: |\_|\_|\_|/|\_|\_|\_|\_|/|\_|\_|\_|\_|\_|
4. Nombre de doses de TPI (Traitement Préventif Intermittent de la femme enceinte): |\_|\_|\_|
5. Date de la dose de TPI la plus récente: |\_|\_|\_|/|\_|\_|\_|\_|/|\_|\_|\_|\_|\_|,
6. taux d'Hb (g/dl) le plus récent: |\_|\_|\_| Date: |\_|\_|\_|/|\_|\_|\_|\_|/|\_|\_|\_|\_|\_|
7. Prise d'antipaludique au cours des deux dernières semaines:  oui,  Non  
 Si oui, Spécifier le médicament:  AL,  Autre.....  
 et date du traitement: |\_|\_|\_|/|\_|\_|\_|\_|/|\_|\_|\_|\_|\_|,
8. Suppléments:  Non,  Fer,  Acide Folique,  Vitamines
9. Nombre d'épisode de paludisme Durant cette grossesse: |\_|\_|\_|
  - a. Date épisode 1: |\_|\_|\_|/|\_|\_|\_|\_|/|\_|\_|\_|\_|\_|,  
 Confirmé par TDR:  Oui,  Non  
 Prise d'antipaludique:  AL,  Autre.....
  - b. Date episode 2: |\_|\_|\_|/|\_|\_|\_|\_|/|\_|\_|\_|\_|\_|,  oui,  Non  
 Confirmé par TDR:  Oui,  Non  
 Prise d'antipaludique:  AL,  Autre.....
  - c. Date episode 3: |\_|\_|\_|/|\_|\_|\_|\_|/|\_|\_|\_|\_|\_|,  oui,  Non  
 Confirmé par TDR:  Oui,  Non  
 Prise d'antipaludique:  AL,  Autre.....
 Traitement antipaludique actuel :  Yes,  No  
 Si oui, spécifier la date: |\_|\_|\_|/|\_|\_|\_|\_|/|\_|\_|\_|\_|\_|,
10. Autres traitements récus pendant cette grossesse:  NA
  - a. .... date début: |\_|\_|\_|/|\_|\_|\_|\_|/|\_|\_|\_|\_|\_|  
 date fin: |\_|\_|\_|/|\_|\_|\_|\_|/|\_|\_|\_|\_|\_| Raison: .....
  - b. .... date début: |\_|\_|\_|/|\_|\_|\_|\_|/|\_|\_|\_|\_|\_|  
 date fin: |\_|\_|\_|/|\_|\_|\_|\_|/|\_|\_|\_|\_|\_| Raison: .....
  - c. .... date début: |\_|\_|\_|/|\_|\_|\_|\_|/|\_|\_|\_|\_|\_|  
 date fin: |\_|\_|\_|/|\_|\_|\_|\_|/|\_|\_|\_|\_|\_| Raison: .....

### 11. Age estimatif de la grossesse:

Date des dernières règles |\_|\_|\_|/|\_|\_|\_|\_|/|\_|\_|\_|\_|\_|

Age gestationnel estimative à l'enrôlement: |\_|\_|\_| Semaines

Hauteur utérine: |\_|\_|\_| cm

Estimé par: .....

Biométrie foetale: .....

.....

Note: .....

Date échographique estimative de l'accouchement |\_|\_|\_|/|\_|\_|\_|\_|/|\_|\_|\_|\_|\_|

## FORMULAIRE DE SELECTION ENROLEMENT

### VI. Examen Medical

Poids: |\_|\_|\_|, |\_| kg      taille: |\_|\_|\_|cm      IMC: |\_|\_|, |\_| Kg/m<sup>2</sup>  
 Température: |\_|\_|, |\_|°C      Presence de fièvre /d'historie de fièvre:  Oui,  Non  
 Tension Arterielle: |\_|\_|\_|/|\_|\_|\_|mmHg      Pouls: |\_|\_|\_|batt./min

### VII. Critères d'inclusion et de non-inclusion: éligibilité pour l'étude

| Critère d'inclusion       |                                                                          |                                                            |
|---------------------------|--------------------------------------------------------------------------|------------------------------------------------------------|
| <b>1.</b>                 | <b><i>La femme enceinte est-elle éligible pour l'enrôlement?</i></b>     | <input type="checkbox"/> NA                                |
|                           | Sujet âgée ≥15-40 ans                                                    | <input type="checkbox"/> Oui, <input type="checkbox"/> Non |
|                           | Sujet volontaire pour les prélèvements sanguins de cette étude?          | <input type="checkbox"/> Oui, <input type="checkbox"/> Non |
|                           | Sujet or RLA a t-il signé le consentement?                               | <input type="checkbox"/> Oui, <input type="checkbox"/> Non |
| <b>2.</b>                 | <b><i>La femme non enceinte est-elle éligible pour l'enrôlement?</i></b> | <input type="checkbox"/> NA                                |
|                           | Sujet âgée ≥15-40 ans                                                    | <input type="checkbox"/> Oui, <input type="checkbox"/> Non |
|                           | Sujet volontaire pour les prélèvements sanguins de cette étude?          | <input type="checkbox"/> Oui, <input type="checkbox"/> Non |
|                           | Sujet or RLA a t-il signé le consentement?                               | <input type="checkbox"/> Oui, <input type="checkbox"/> Non |
|                           | Le test urinaire de grossesse est-il negative?                           | <input type="checkbox"/> Oui, <input type="checkbox"/> Non |
| <b>3.</b>                 | <b><i>L'enfant d'âge scolaire est-il éligible pour l'enrôlement?</i></b> | <input type="checkbox"/> NA                                |
|                           | Sujet âgé ≥5-14 ans                                                      | <input type="checkbox"/> Oui, <input type="checkbox"/> Non |
|                           | Sujet volontaire pour les prélèvements sanguins de cette étude?          | <input type="checkbox"/> Oui, <input type="checkbox"/> Non |
|                           | Sujet or RLA a t-il signé le consentement?                               | <input type="checkbox"/> Oui, <input type="checkbox"/> Non |
|                           | Le test urinaire de grossesse est-il negative?                           | <input type="checkbox"/> Oui, <input type="checkbox"/> Non |
| Critères de non inclusion |                                                                          |                                                            |
|                           | Paludisme compliqué (basé sur les critères OMS)                          | <input type="checkbox"/> Oui, <input type="checkbox"/> Non |
|                           | Participation précédente ou actuel à un essai de vaccin antipaludique    | <input type="checkbox"/> Oui, <input type="checkbox"/> Non |
|                           | Sujet sous chimioprophylaxie (exemple, sujets avec Drépanocytose)        | <input type="checkbox"/> Oui, <input type="checkbox"/> Non |
|                           | Transfusion sanguine récente (dans les 3 derniers mois)                  | <input type="checkbox"/> Oui, <input type="checkbox"/> Non |

Le participant est-il éligible pour l'étude?  Oui,  Non

Si oui, alors, poursuivre le reste du questionnaire.

Si non, arrêter le questionnaire ici, et référer le participant pour sa prise en charge s'il y a lieu.

### VIII. Evaluations de Laboratoire

- a. Le test urinaire de grossesse a t-il été réalisé?  NA,  
 Non, mais confirmé précédemment par .....  
 Oui, Si oui, préciser le résultat: |\_| | 1=Positif, 2=Négatif, 3=Invalide

## FORMULAIRE DE SELECTION ENROLEMENT

### b. Blood sampling

| Blood sampling                                                                   | Volume                                 | Sampling performed                                         |
|----------------------------------------------------------------------------------|----------------------------------------|------------------------------------------------------------|
| Goutte épaisse / frottis sanguin                                                 | 20µL                                   | <input type="checkbox"/> Oui, <input type="checkbox"/> Non |
| RDT (if applicable: Fever or reported fever)                                     | 5µL                                    | <input type="checkbox"/> Oui, <input type="checkbox"/> Non |
| Hb                                                                               | 20µL                                   | <input type="checkbox"/> Oui, <input type="checkbox"/> Non |
| Sang dans un tampon RNA protect                                                  | 200 µL (2 aliquots of 100 µL)          | <input type="checkbox"/> Oui, <input type="checkbox"/> Non |
| Taux sanguin de SP                                                               | 100 µL                                 | <input type="checkbox"/> Oui, <input type="checkbox"/> Non |
| PfHRP-2 et autres marqueurs clinique                                             | 100 µL (50 – 60 µL de plasma + pellet) | <input type="checkbox"/> Oui, <input type="checkbox"/> Non |
| Papier filtre pour l'analyse moléculaire des parasites et dosages immunologiques | 60 µL                                  | <input type="checkbox"/> Oui, <input type="checkbox"/> Non |

### IX. Enrôlement du participant dans l'étude

Le sujet a-t-il été enrôlé?  Oui,  Non

Si oui, Préciser son N° d'étude: **IMH|\_|\_|\_|- P** (“-P” pour participante enceinte)

**IMH|\_|\_|\_|- NP** (“-NP” pour participante Non enceinte)

**IMH|\_|\_|\_|- C** (“-C” pour participant enfant)

Si femme enceinte:

La participante a-t-elle été enrôlé :  Primigravidae  Secundigravidae  Multigravidae?

Commentaire:

## FORMULAIRE DE SELECTION ENROLEMENT

### X. Facteurs de risque du paludisme

#### 1. Utilisation des moustiquaires :

Dormez-vous sous habituellement sous une moustiquaire?  Oui,  Non

Avez-vous dormi sous une moustiquaire la nuit précédente?  Oui,  Non

Si non, donnez la raison: .....

Si Oui, spécifier les conditions/l'état de la moustiquaire:

Age de la moustiquaire: |\_|\_| (mois),

Origine de la moustiquaire:  PNLP,  Commerciale

Nom de marque de la moustiquaire: .....

Intégrité de la moustiquaire:  Entière,  Trouée,  Déchirée

Nombre de fois que la moustiquaire a été lavé |\_|\_|

#### 2. Utilisation d'autres mesures de protection antipaludique:

Pulvérisation intradomiciliaire (PID) au cours des 3 derniers mois?  Oui,  Non

Spirale anti-moustique  Oui,  Non

Pulvérisation de bombe insecticide  Oui,  Non

Répulsifs traditionnels  Oui,  Non

Répulsifs commerciaux  Oui,  Non

#### 3. Utilisation de médicaments antipaludiques

Prise d'antipaludique au cours des deux dernières semaines:  Oui,  Non

Si oui, spécifier :  AL,  Autres, spécifier .....

Date du traitement: |\_|\_|/|\_|\_|/|\_|\_|

Traitement antipaludique actuelle:  Oui,  Non

Si oui, spécifier .....

Prise de Chimio prophylaxie du Paludisme Saisonnier (CPS) ?  Oui,  Non

Si oui, date de la dernière dose? |\_|\_|/|\_|\_|/|\_|\_|

#### 4. Les habitudes de sommeil

Heure estimative du coucher de la dernière nuit: |\_|\_|:|\_|\_|

Heure estimative du réveil (sortir du lit) ce matin: |\_|\_|:|\_|\_|

Combien de fois sortez-vous du lit habituellement au cours de la nuit? |\_|\_|

Combien de fois êtes-vous sorti du lit au cours de la nuit précédente? |\_|\_|

## FORMULAIRE DE SELECTION ENROLEMENT

5. **Facteurs de risques socio-économiques:**  NA (Si le participant est du groupe d'âge scolaire)

a). **Groupe ethnique:** .....

b). **Niveau d'éducation scolaire**

Non scolarisé       Primaire       Secondaire       Universitaire

c). **Profession:**

Cultivateur       commerçante       Fonctionnaire       Auto-employeur

Autre, spécifier.....

d). **Possession de biens matériels:**

Radio       Téléphone mobile

e). **Conditions du logement: Maison avec:**

Toiture en métal       Toiture en paille       Ouverture avant-toît

Présence de fenêtre:  Oui       Non,      Si Oui, spécifier le nombre |\_\_|\_\_|

Position de la fenêtre avec la porte:  Du côté de la porte et nombre |\_\_|

Derrière la porte et nombre |\_\_|

Taille fenêtres:  Petite       Moyenne       grande

Taille de la concession: Nombre de chambres |\_\_|\_\_|, Nombre de personnes |\_\_|\_\_|

Présence d'électricité:  Oui,       Non

f). **Présence d'hôte alternatifs (animaux domestiques) :**  Oui,       Non

g). **Propriétaire terrien:**  Oui,       Non

h). **Distance au centre de santé:**  < 3km,       3-5 km,       > 5km

j). **Présence d'habits accrochés dans la chambre:**  Oui,       Non

k). **Propreté de la maison:**  Oui,       Non

l). **Présence de déchets solides à proximité de la concession:**  Oui,       Non

Date: |\_\_|\_\_|/|\_\_|\_\_|/|\_\_|\_\_|\_\_|

Initiales and Signature de l'Investigateur.....
